# Supplementary material
Source: PubMed Central journal article supplement (PMC3589198)
Supplement: supp_WNL.0b013e3182768910_Tables_e-1-3.pdf [file supp_WNL.0b013e3182768910_Tables_e-1-3.pdf]

**table e-1. A.** Linkage disequilibrium (LD) between *FTO* variants.

| LD                       | <i>FTO</i> dbSNP ID | rs1421085 (1) | rs17817449 (2) | rs8050136 (3) | rs9939609 (4) | -- |
|--------------------------|---------------------|---------------|----------------|---------------|---------------|----|
| $r^2$ , White            | rs1421085           | x             | 0.948          | 0.943         | 0.941         |    |
|                          | rs17817449          | 0.948         | x              | 0.992         | 0.989         |    |
|                          | rs8050136           | 0.943         | 0.992          | x             | 0.993         |    |
|                          | rs9939609           | 0.941         | 0.989          | 0.993         | x             |    |
| $r^2$ , African-American | rs1421085           | x             | 0.166          | 0.137         | 0.112         |    |
|                          | rs17817449          | 0.166         | x              | 0.832         | 0.689         |    |
|                          | rs8050136           | 0.137         | 0.832          | x             | 0.827         |    |
|                          | rs9939609           | 0.112         | 0.689          | 0.827         | x             |    |

**B.** Haplotype association analysis for *FTO* variants and 6-year change in scores on three neuropsychological tests.

| Haplotypes (Freq.) White | DWRT (Beta)      | p     | DSST (Beta)      | p     | WFT (Beta)      | p     |
|--------------------------|------------------|-------|------------------|-------|-----------------|-------|
| 4-marker (1-2-3-4)       |                  |       |                  |       |                 |       |
| TTCT (0.584)             | 0.075            | 0.002 | 0.113            | 0.261 | 0.077           | 0.536 |
| CGAA (0.401)             | -0.073           | 0.002 | -0.091           | 0.371 | -0.105          | 0.403 |
| 3-marker (1-2-3)         |                  |       |                  |       |                 |       |
| TTC (0.584)              | 0.075            | 0.002 | 0.114            | 0.256 | 0.083           | 0.507 |
| CGA (0.402)              | -0.074           | 0.002 | -0.091           | 0.369 | -0.101          | 0.421 |
| 3-marker (2-3-4)         |                  |       |                  |       |                 |       |
| TCT (0.593)              | 0.068            | 0.004 | 0.092            | 0.365 | 0.064           | 0.607 |
| GAA (0.404)              | -0.070           | 0.003 | -0.081           | 0.422 | -0.070          | 0.578 |
| 2-marker (1-2)           |                  |       |                  |       |                 |       |
| TT (0.584)               | 0.074            | 0.002 | 0.113            | 0.266 | 0.072           | 0.569 |
| CG (0.404)               | -0.072           | 0.003 | -0.105           | 0.304 | -0.098          | 0.435 |
| 2-marker (2-3)           |                  |       |                  |       |                 |       |
| TC (0.593)               | 0.069            | 0.004 | 0.112            | 0.270 | 0.063           | 0.616 |
| GA (0.405)               | -0.072           | 0.003 | -0.096           | 0.349 | -0.056          | 0.658 |
| 2-marker (3-4)           |                  |       |                  |       |                 |       |
| CT (0.595)               | 0.067            | 0.005 | 0.120            | 0.237 | 0.059           | 0.639 |
| AA (0.404)               | -0.066           | 0.006 | -0.120           | 0.237 | -0.068          | 0.591 |
| Haplotypes (Freq.) AA    | DWRT ( $\beta$ ) | p     | DSST ( $\beta$ ) | p     | WFT ( $\beta$ ) | p     |
| 4-marker (1-2-3-4)       |                  |       |                  |       |                 |       |
| TTCT (0.522)             | -0.070           | 0.187 | 0.404            | 0.135 | 0.283           | 0.267 |
| TGAA (0.276)             | 0.056            | 0.347 | -0.270           | 0.371 | -0.086          | 0.763 |
| CGAA (0.103)             | 0.099            | 0.270 | -0.370           | 0.415 | 0.044           | 0.918 |
| TTCA (0.048)             | -0.037           | 0.775 | -0.837           | 0.203 | -0.314          | 0.612 |
| TTAA (0.044)             | -0.036           | 0.787 | 0.001            | 0.999 | -0.767          | 0.226 |
| 3-marker (1-2-3)         |                  |       |                  |       |                 |       |
| TTC (0.570)              | -0.081           | 0.133 | 0.280            | 0.305 | 0.230           | 0.373 |
| TGA (0.277)              | 0.046            | 0.437 | -0.196           | 0.515 | -0.122          | 0.668 |
| CGA (0.103)              | 0.111            | 0.214 | -0.389           | 0.389 | 0.018           | 0.967 |
| TTA (0.045)              | -0.020           | 0.879 | -0.020           | 0.976 | -0.727          | 0.248 |
| 3-marker (2-3-4)         |                  |       |                  |       |                 |       |
| TCT (0.525)              | -0.066           | 0.211 | 0.422            | 0.114 | 0.258           | 0.307 |
| GAA (0.379)              | 0.080            | 0.140 | -0.375           | 0.174 | -0.052          | 0.844 |
| TCA (0.048)              | -0.039           | 0.765 | -0.858           | 0.191 | -0.269          | 0.665 |
| TAA (0.044)              | -0.007           | 0.959 | 0.078            | 0.906 | -0.673          | 0.284 |
| 2-marker (1-2)           |                  |       |                  |       |                 |       |
| TT (0.614)               | -0.089           | 0.109 | 0.294            | 0.296 | 0.135           | 0.610 |
| TG (0.278)               | 0.055            | 0.363 | -0.195           | 0.521 | -0.142          | 0.622 |
| CG (0.104)               | 0.102            | 0.261 | -0.416           | 0.363 | -0.033          | 0.939 |
| 2-marker (2-3)           |                  |       |                  |       |                 |       |
| TC (0.573)               | -0.093           | 0.089 | 0.290            | 0.296 | 0.166           | 0.524 |
| GA (0.382)               | 0.093            | 0.095 | -0.305           | 0.281 | -0.032          | 0.903 |
| TA (0.045)               | 0.006            | 0.966 | 0.031            | 0.963 | -0.700          | 0.263 |
| 2-marker (3-4)           |                  |       |                  |       |                 |       |
| CT (0.525)               | -0.061           | 0.255 | 0.430            | 0.115 | 0.204           | 0.426 |
| AA (0.424)               | 0.070            | 0.200 | -0.323           | 0.243 | -0.117          | 0.654 |
| CA (0.048)               | -0.036           | 0.782 | -0.992           | 0.134 | -0.305          | 0.623 |

LD was estimated using the computer program Haploview version 4.2, and haplotype association analysis was performed using a sliding window approach with PLINK software.(1, 2) Phased haplotype frequencies were inferred from genotyping data using an expectation-maximization (EM) algorithm. The SNPs in each haplotype are indicated by the number assigned to each marker at the top of the table. SNP, single nucleotide polymorphism, Freq., frequency; AA, African-American;  $\beta$ , beta coefficient; p, p-value adjusted for age, gender, and education; References: 1. Barrett JC, Fry B, Maller J, Daly MJ. Haploview: analysis and visualization of LD and haplotype maps. *Bioinformatics* 2005;21:263-265; 2. Purcell S, Neale B, Todd-Brown K, et al. PLINK: a tool set for whole-genome association and population-based linkage analyses. *Am J Hum Genet* 2007;81:559-575.

| table e-2. MRI Measurements of Brain Volume and <i>FTO</i> genotype. ARIC study (2004 – 2006) |           |       |      |      |            |       |       |      |
|-----------------------------------------------------------------------------------------------|-----------|-------|------|------|------------|-------|-------|------|
|                                                                                               | rs9939609 |       |      |      | rs17817449 |       |       |      |
| White                                                                                         | N         | B     | SE   | p    | N          | B     | SE    | p    |
| Brain Vol. (cm <sup>3</sup> )                                                                 | 470       | -0.82 | 3.05 | 0.79 | 467        | -0.63 | 3.04  | 0.84 |
| Hippocampal Vol. (log.)                                                                       | 457       | 0.00  | 0.01 | 0.72 | 454        | 0.00  | 0.01  | 0.75 |
| Total Intracranial Vol. (cm <sup>3</sup> )                                                    | 471       | -0.40 | 7.36 | 0.96 | 468        | 1.80  | 7.31  | 0.81 |
|                                                                                               |           |       |      |      |            |       |       |      |
| AA                                                                                            | N         | B     | SE   | p    | N          | B     | SE    | p    |
| Brain Vol. (cm <sup>3</sup> )                                                                 | 475       | -4.42 | 3.34 | 0.19 | 474        | -2.88 | 3.44  | 0.40 |
| Hippocampal Vol. (log.)                                                                       | 467       | -0.00 | 0.01 | 1.00 | 469        | 0.01  | 0.01  | 0.40 |
| Total Intracranial Vol. (cm <sup>3</sup> )                                                    | 487       | -1.78 | 6.53 | 0.78 | 486        | 0.54  | 6.80  | 0.94 |
|                                                                                               |           |       |      |      |            |       |       |      |
|                                                                                               | rs8050136 |       |      |      | rs1421085  |       |       |      |
| White                                                                                         | N         | B     | SE   | p    | N          | B     | SE    | p    |
| Brain Vol. (cm <sup>3</sup> )                                                                 | 464       | -0.70 | 3.01 | 0.82 | 464        | -0.64 | 3.06  | 0.83 |
| Hippocampal Vol. (log.)                                                                       | 451       | 0.00  | 0.01 | 0.63 | 451        | 0.00  | 0.01  | 0.62 |
| Total Intracranial Vol. (cm <sup>3</sup> )                                                    | 465       | 0.91  | 7.35 | 0.90 | 465        | -0.11 | 7.35  | 0.99 |
|                                                                                               |           |       |      |      |            |       |       |      |
| AA                                                                                            | N         | B     | SE   | p    | N          | B     | SE    | p    |
| Brain Vol. (cm <sup>3</sup> )                                                                 | 481       | -3.32 | 3.36 | 0.32 | 479        | 4.65  | 5.70  | 0.42 |
| Hippocampal Vol. (log.)                                                                       | 475       | -0.00 | 0.01 | 0.88 | 473        | 0.01  | 0.01  | 0.38 |
| Total Intracranial Vol. (cm <sup>3</sup> )                                                    | 494       | -2.35 | 6.60 | 0.72 | 491        | 10.51 | 11.12 | 0.34 |

At the third clinical examination (1993-1995), 1,920 participants aged 55 years and older from two of the ARIC study field centers (Forsyth County, NC and Jackson, MS) were invited to undergo cranial MRI. In 2004-2006, 1,134 participants completed a second brain MRI examination and measurements of brain volume, hippocampal volume, and total intracranial volume were performed. (1) General linear models were used to analyze the association between three measures of brain volume and *FTO* genotype under an additive genetic model after adjusting for age, sex, and total intracranial volume (brain volume and hippocampal volume), or age and sex (total intracranial volume). N, number;  $\beta$ , beta coefficient; SE, standard error; rs, reference SNP; Vol., volume; log, natural log-transformed hippocampal volume; p, p-value; References: 1. Knopman DS, Penman AD, Catellier DJ et al. Vascular risk factors and longitudinal changes on brain MRI: the ARIC study. *Neurology* 2011;76:1879-1885

**table e-3.** Proportion of variance in cognitive change explained by *FTO* variants detectable at 80% power

| <i>FTO</i> dbSNP ID | Cognitive Change Assessed by Neuropsychological Tests |                                      |
|---------------------|-------------------------------------------------------|--------------------------------------|
|                     | R <sup>2</sup><br>(AA)<br>N = 2,083                   | R <sup>2</sup><br>White<br>N = 8,364 |
| rs9939609           | 0.008                                                 | 0.002                                |
| rs8050136           | 0.008                                                 | 0.002                                |
| rs17817449          | 0.008                                                 | 0.002                                |
| rs1421085           | 0.008                                                 | 0.002                                |

Power analyses were performed with the program Quanto (<http://hydra.usc.edu/GxE/>) using a fixed sample size for white and African-American study participants, cognitive change calculated as the difference between the scores on each neuropsychological test (Delayed Word Recall Test, Digit Symbol Substitution Test, Word Fluency Test) at the second administration and the first administration and modeled as a continuous variable, a p-value of 0.002, and the allele frequencies in the study sample. SNP, single nucleotide polymorphism; dbSNP, The National Center for Biotechnology Information's SNP database (<http://www.ncbi.nlm.nih.gov/SNP>); ID, identification; rs, reference SNP; AA, African-American; N, number
